# Supplementary material for: Selection of HIV-1 for resistance to fifth-generation protease inhibitors reveals two independent pathways to high-level resistance
Source: eLife. 2023 Mar 15;12:e80328. doi: 10.7554/eLife.80328 (PMC10065791; doi:10.7554/eLife.80328)
Supplement: Figure 2—figure supplement 4—source data 1. [file elife-80328-fig2-figsupp4-data1.xlsx]

## Sheet: Figure 2 - figure supplement 4
Culture Name	DRV Conc. (nM)
	Position	10	13	16	32	33	37	41	45	46	47	50	53	54	63	71	74	76	82	84	85	89	91	Abundance
	Wild-type Amino Acid	L	I	G	V	L	S	R	K	M	I	I	F	I	L	A	T	L	V	I	I	L	T
DRVwt	1350				32I			41I		46I	47V								82I	84V	85V			0.628
DRV1mut	3000		13V	16E	32I	33F			45I	46I									82F	84V				0.454
DRV2mut	5000	10F				33F				46I	47V	50V	53L		63P						85V	89M		0.614
DRV3mut	5000	10F			32I	33F	37D			46I					63P		74S	76V		84V		89M		0.511
DRV4mut	5000	10I			32I	33F			45I					54L		71V			82I	84V			91S	0.34
