# Supplementary material for: Selection of HIV-1 for resistance to fifth-generation protease inhibitors reveals two independent pathways to high-level resistance
Source: eLife. 2023 Mar 15;12:e80328. doi: 10.7554/eLife.80328 (PMC10065791; doi:10.7554/eLife.80328)
Supplement: Figure 2—source data 1. [file elife-80328-fig2-data1.xlsx]

## Sheet: Figure 2 - source data 1
Culture Name	Enzyme Name	Max Inhib. Conc. (nM)	R1	R2	PIs	Wild-Type Selection: Most Abundant Variants Detected at the Last Time Point
					Position	10	11	12	13	15	16	28	32	33	36	43	45	46	47	50	53	54	63	66	71	72	73	74	76	82	84	85	88	89	91	92	93	Abundance
					Wild-type Amino Acid	L	V	T	I	I	G	A	V	L	M	K	K	M	I	I	F	I	L	I	A	I	G	T	L	V	I	I	N	L	T	Q	I
V1wt	-	5000	1	1	UMASS-1	10I					16E		32I	33F				46I				54L			71V				76V	82I	84V							0.554
V2wt	-	5000	1	2	UMASS-2	10F								33F				46I	47V	50V					71V					82I	84V							0.375
V3wt	PR-3wt	5000	1	3	UMASS-3	10F								33F				46I	47V	50V	53L		63P		71V				76S	82I		85V		89I				0.857
V4wt	PR-4wt	5000	1	4	UMASS-4	10F	11I		13V				32I	33F		43T		46L				54L			71V					82I	84V			89M	91S	92R		0.873
V5wt	PR-5wt	5000	1	5	UMASS-5	10F				15V								46I	47V	50V	53L				71V					82I	84V			89T				0.679
V6wt	-	5000	2	1	UMASS-6	10F			13V					33F				46I	47A	50V	53L				71V													0.451
V7wt	-	5000	2	2	UMASS-7	10F			13V					33F				46I	47V	50V	53L	54L			71V					82I								0.945
V8wt	-	5000	2	3	UMASS-8	10F		12K						33F				46I	47V	50V	53L	54L	63P		71V					82I		85V						0.554
V9wt	PR-9wt	5000	2	4	UMASS-9	10F			13V					33F			45R	46I	47V	50V	53L	54L		66F	71V			74A	76S	82I								0.923
V10wt	-	5000	2	5	UMASS-10	10F			13V					33F		43T		46I	47V	50V		54L			71V					82L			88S					0.912
DRVwt	-	1350	-	1	DRV								32I		41I			46I	47V											82I	84V	85V						0.628
NDwt	PR-WT	0			ND																																	WT 82.9%
Culture Name	Enzyme Name	Max Inhib. Conc. (nM)	R1	R2	PIs	Mutant Selection: Most Abundant Variants Detected at the Last Time Point
					Position	10	11	12	13	15	16	28	32	33	36	43	45	46	47	50	53	54	63	66	71	72	73	74	76	82	84	85	88	89	91	92	93	Abundance
					Wild-type Amino Acid	L	V	T	I	I	G	A	V	L	M	K	K	M	I	I	F	I	L	I	A	I	G	T	L	V	I	I	N	L	T	Q	I
V2mut	PR-2mut	4000	1	2	UMASS-2	10I							32I	33F			45I	46I		50V					71V					82I	84V							0.348
V4mut	-	1275	1	4	UMASS-4	10F						28S						46I													84V							0.094
V6mut	-	5000	2	1	UMASS-6				13V		16E		32I	33F			45I	46I				54L			71V				76V	82F	84V							0.628
V7mut	-	400	2	2	UMASS-7	10F												46I		50V			63P									85V						0.21
V8mut	PR-8mut	1300	2	3	UMASS-8	10F												46I	47V	50V	53L		63P			72V	73S			82I		85V						0.7
DRV1mut	PR-Dmut	3000	-	1	DRV				13V		16E		32I	33F			45I	46I												82F	84V							0.454
NDmut	-	0			ND																																93L	0.367
