# Supplementary material for: Selection of HIV-1 for resistance to fifth-generation protease inhibitors reveals two independent pathways to high-level resistance
Source: eLife. 2023 Mar 15;12:e80328. doi: 10.7554/eLife.80328 (PMC10065791; doi:10.7554/eLife.80328)
Supplement: Figure 2—source data 2. [file elife-80328-fig2-data2.xlsx]

## Sheet: Figure 1-source data 2
Wild-type Selection: Most Abundant Variants Detected at the Last Time Point
Position					10	11	12	13	15	16	28	32	33	36	41	43	45	46	47	50	53	54	63	66	67	71	72	73	74	76	77	82	84	85	87	88	89	91	92	93	Abundance
Wild-Type Amino Acid					L	V	T	I	I	G	A	V	L	M	R	K	K	M	I	I	F	I	L	I	C	A	I	G	T	L	V	V	I	I	R	N	L	T	Q	I
Passage	[PI] nM	R1	R2	PIs
75	5000	1	1	UMASS-1	10I					16E		32I	33F					46I				54L				71V				76V		82I	84V								0.554
					10I							32I	33F					46I				54L				71V				76V		82I	84V								0.219
					10I					16E		32I	33F					46I				54L				71V				76V		82I	84V					91S			0.062
82	5000	1	2	UMASS-2	10F								33F					46I	47V	50V						71V						82I	84V								0.375
											28S	32I	33F					46I	47V	50V						71V						82I	84V								0.335
													33F					46I	47V	50V						71V						82I	84V								0.042
93	5000	1	3	UMASS-3	10F								33F					46I	47V	50V	53L		63P			71V				76S		82I		85V			89I				0.857
					10F								33F					46I	47V	50V	53L		63P			71V				76S		82I		85V			89I	91S			0.011
					10F								33F					46I	47V	50V	53L		63P			71V				76S		82I									0.009
81	5000	1	4	UMASS-4	10F	11I		13V				32I	33F			43T		46L				54L				71V						82I	84V				89M	91S	92R		0.873
					10F	11I						32I	33F			43T		46L				54L				71V						82I	84V				89M	91S			0.013
					10F	11I						32I	33F					46L				54L				71V						82I	84V				89M	91S			0.011
77	5000	1	5	UMASS-5	10F				15V									46I	47V	50V	53L					71V						82I	84V				89T				0.679
					10F													46I	47V	50V	53L					71V						82I	84V				89T				0.109
					10F													46I	47V	50V	53L		63P			71V						82I	84V				89M				0.088
46	5000	2	1	UMASS-6	10F			13V					33F					46I	47A	50V	53L					71V															0.451
					10F			13V					33F					46I	47A	50V	53L		63P			71V															0.423
					10F			13V		16E			33F					46I	47A	50V	53L					71V															0.022
76	5000	2	2	UMASS-7	10F			13V					33F					46I	47V	50V	53L	54L				71V						82I									0.945
					10F			13V					33F					46I	47V	50V	53L	54L				71V						82I			87K						0.002
					10F			13V					33F					46I	47V	50V	53L	54L			67Y	71V						82I									0.002
67	5000	2	3	UMASS-8	10F		12K						33F					46I	47V	50V	53L	54L	63P			71V						82I		85V							0.554
					10F								33F					46I	47V	50V	53L	54L	63P			71V						82I		85V							0.419
					10F		12K						33F					46I	47V	50V	53L	54L	63P			71V						82I		85V	87K						0.001
78	5000	2	4	UMASS-9	10F			13V					33F				45R	46I	47V	50V	53L	54L		66F		71V			74A	76S		82I									0.923
					10F			13V					33F		41K		45R	46I	47V	50V	53L	54L		66F		71V			74A	76S		82I									0.007
					10F			13V					33F				45R	46I	47V	50V	53L	54L		66F		71V			74A	76S		82I			87K						0.004
77	5000	2	5	UMASS-10	10F			13V					33F			43T		46I	47V	50V		54L				71V						82L				88S					0.912
					10F			13V					33F			43T		46I	47V	50V		54L				71V					77I	82L				88S					0.016
					10F			13V					33F			43T		46I	47V	50V		54L				71V						82L			87K	88S					0.002
43	1350	-	1	DRV								32I			41I			46I	47V													82I	84V	85V							0.628
					10I							32I			41I			46I	47V													82I	84V	85V							0.103
												32I			41I			46I	47V													82L	84V	85V							0.101
75	0			ND																																					WT 82.9%
														36I																											0.012
															41K																										0.01
Mutant Selection: Most Abundant Variants Detected at the Last Time Point
Position					10	11	12	13	15	16	28	32	33	36	41	43	45	46	47	50	53	54	63	66	67	71	72	73	74	76	77	82	84	85	87	88	89	91	92	93	Abundance
Wild-Type Amino Acid					L	V	T	I	I	G	A	V	L	M	R	K	K	M	I	I	F	I	L	I	C	A	I	G	T	L	V	V	I	I	R	N	L	T	Q	I
Passage	[PI] nM	R1	R2	PIs
53	4000	1	2	UMASS-2	10I							32I	33F				45I	46I		50V						71V						82I	84V								0.348
					10I						28S	32I	33F					46I								71V						82I	84V								0.292
					10I						28S	32I	33F				45I	46I		50V						71V						82I	84V								0.027
45	1275	1	4	UMASS-4	10F						28S							46I															84V								0.094
					10F							32I						46I				54M				71V						82I	84V				89M				0.082
					10F							32I						46I				54M											84V								0.07
53	5000	2	2	UMASS-6				13V	16E			32I	33F				45I	46I				54L				71V				76V		82F	84V								0.628
								13V	16E			32I	33F				45I	46I				54L										82F	84V								0.169
								13V	16E			32I	33F				45I	46I								71V				76V		82F	84V								0.061
58	400	2	2	UMASS-7	10F													46I		50V			63P											85V	85V						0.21
											28S							46I					63P											85V	85V						0.189
					10F						28S							46I					63P											85V	85V						0.163
61	1300	2	2	UMASS-8	10F													46I	47V	50V	53L		63P				72V	73S				82I		85V	85V						0.7
					10F										41K			46I	47V	50V	53L		63P				72V	73S				82I		85V	85V						0.193
					10F													46I	47V	50V			63P				72V	73S				82I		85V	85V						0.014
39	3000	-	1	DRV-1				13V	16E			32I	33F				45I	46I														82F	84V								0.454
								13V	16E			32I	33F				45I	46I								71V				76V		82F	84V								0.373
								13V	16E			32I	33F				45I	46I								71V						82F	84V								0.015
61	0			ND																																				93L	0.367
														36I																										93L	0.126
																																									WT 12.3%
