# Supplementary material for: Selection of HIV-1 for resistance to fifth-generation protease inhibitors reveals two independent pathways to high-level resistance
Source: eLife. 2023 Mar 15;12:e80328. doi: 10.7554/eLife.80328 (PMC10065791; doi:10.7554/eLife.80328)
Supplement: Figure 7—source data 1. [file elife-80328-fig7-data1.xlsx]

## Sheet: Figure 7 - source data 1
			NC	SP2	p6
PI	[nM]	Pathway	P2	-	P1'	P5'
U1	5000	84V	V			L
U4	1275	84V	V		F
U4	5000	84V	I			I
U6	5000	84V	V
U3	5000	50V			F	L
U6	5000	50V				L
U7	5000	50V			F
U8	1300	50V				L
U8	5000	50V			F
U9	5000	50V			F
U10	5000	50V			F
U2	4000	50V+84V				L
U2	5000	50V+84V			F	L
U5	5000	50V+84V			F	L
