# Supplementary material for: Selection of HIV-1 for resistance to fifth-generation protease inhibitors reveals two independent pathways to high-level resistance
Source: eLife journal article supplement (doi:10.7554/elife.80328), 2023-03-15
Supplement: supp [file elife-80328-supp-v1.zip]

**A**

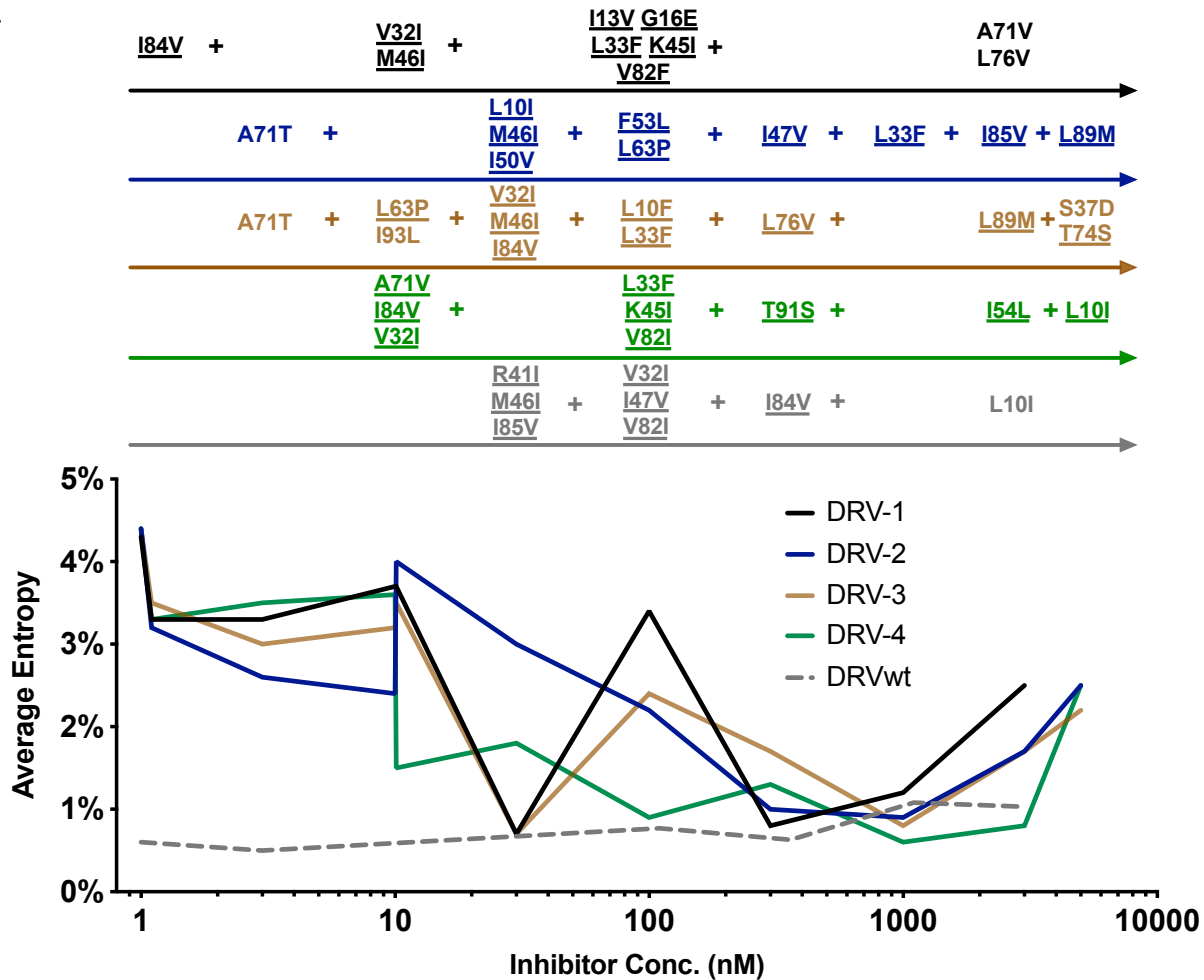

**B**

**Most Abundant Variants Detected at the Last Time Point**

| Culture Name         | DRV Conc. (nM) | Most Abundant Variants Detected at the Last Time Point |    |     |    |     |    |     |     |     |     |     |     |     |     |     |     |     |     |     |     |     |     |           |       |       |       |       |
|----------------------|----------------|--------------------------------------------------------|----|-----|----|-----|----|-----|-----|-----|-----|-----|-----|-----|-----|-----|-----|-----|-----|-----|-----|-----|-----|-----------|-------|-------|-------|-------|
| Position             |                | 10                                                     | 13 | 16  | 32 | 33  | 37 | 41  | 45  | 46  | 47  | 50  | 53  | 54  | 63  | 71  | 74  | 76  | 82  | 84  | 85  | 89  | 91  | Abundance |       |       |       |       |
| Wild-type Amino Acid |                | L                                                      | I  | G   | V  | L   | S  | R   | K   | M   | I   | I   | F   | I   | L   | A   | T   | L   | V   | I   | I   | L   | T   |           |       |       |       |       |
| DRVwt                | 1350           | 32I                                                    |    |     |    | 41I |    |     | 46I |     | 47V |     | 82I |     |     |     |     |     |     |     |     |     | 84V |           | 85V   |       | 62.8% |       |
| DRV1mut              | 3000           | 13V                                                    |    | 16E |    | 32I |    | 33F |     | 45I |     | 46I |     | 82F |     |     |     |     |     |     |     |     |     | 84V       |       |       |       | 45.4% |
| DRV2mut              | 5000           | 10F                                                    |    | 33F |    |     |    |     | 46I |     | 47V |     | 50V |     | 53L |     | 63P |     | 85V |     |     |     |     | 89M       |       | 61.4% |       |       |
| DRV3mut              | 5000           | 10F                                                    |    | 32I |    | 33F |    | 37D |     | 46I |     | 63P |     |     |     |     | 74S |     | 76V |     | 84V |     | 89M |           | 51.1% |       |       |       |
| DRV4mut              | 5000           | 10I                                                    |    | 32I |    | 33F |    | 45I |     |     | 54L |     |     |     |     | 71V |     | 82I |     | 84V |     | 91S |     | 34.0%     |       |       |       |       |
