# Supplementary figures and images for: Selection of HIV-1 for resistance to fifth-generation protease inhibitors reveals two independent pathways to high-level resistance
Source: eLife journal article supplement (doi:10.7554/elife.80328), 2023-03-15

**A****I84V Pathway**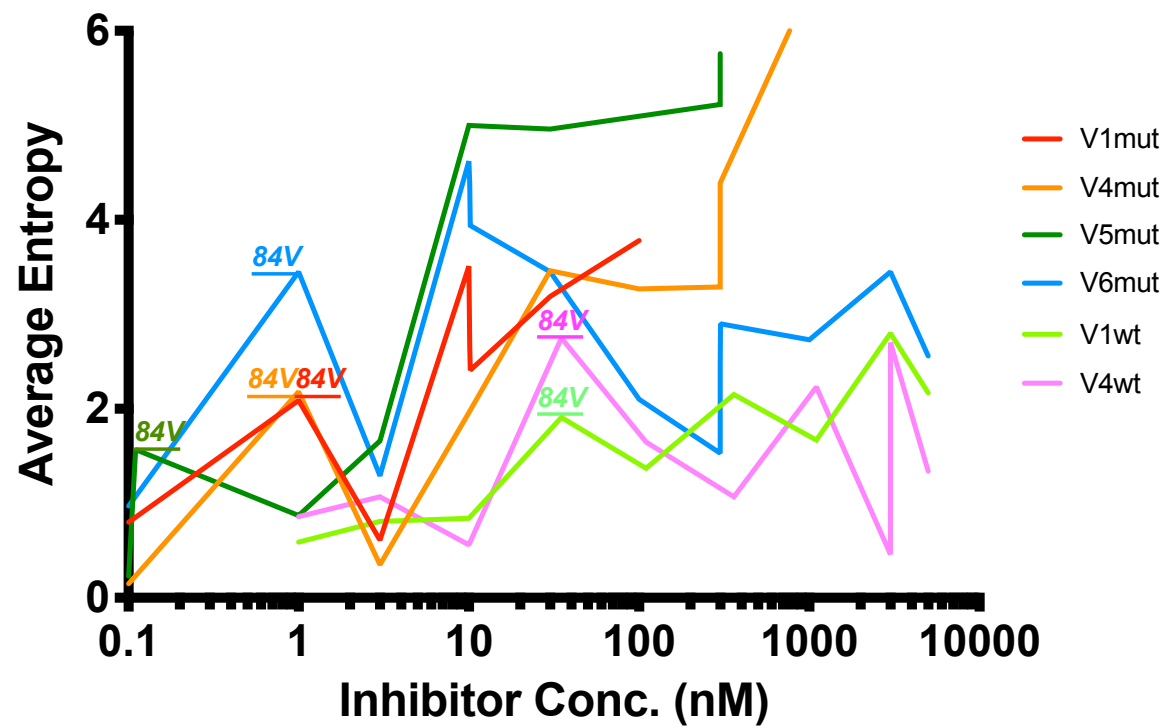**B****I50V Pathway**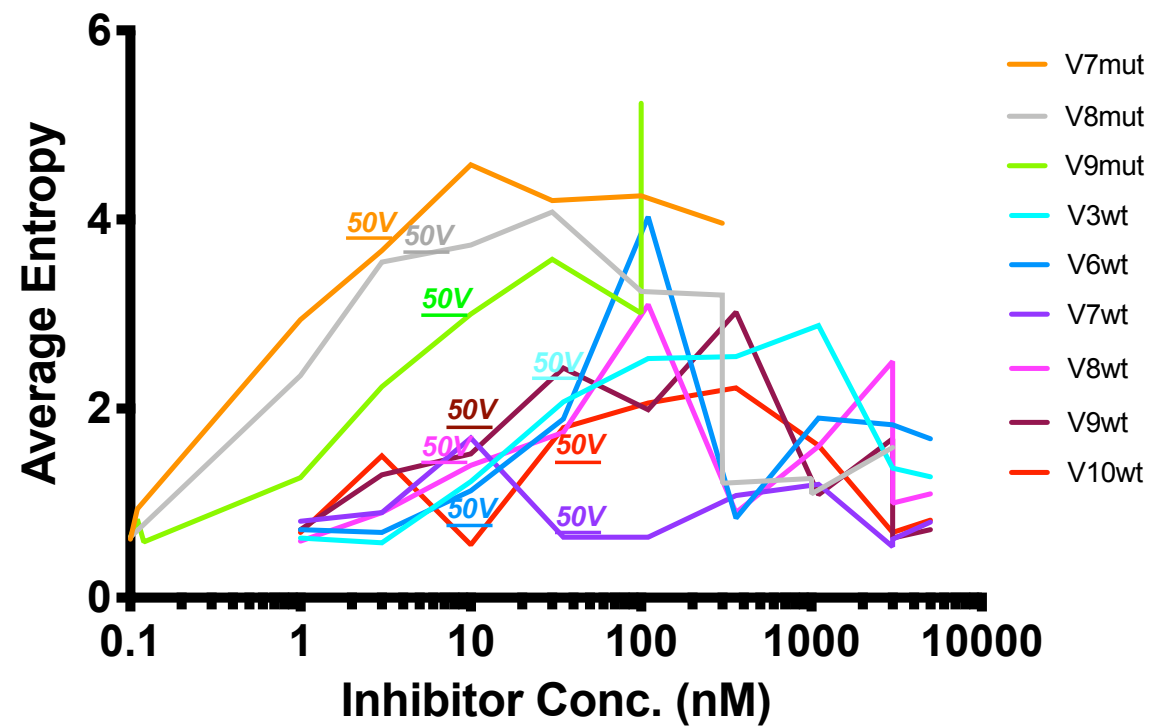

Supplement: supp [file elife-80328-supp-v1.zip]

# Selection with wild type virus

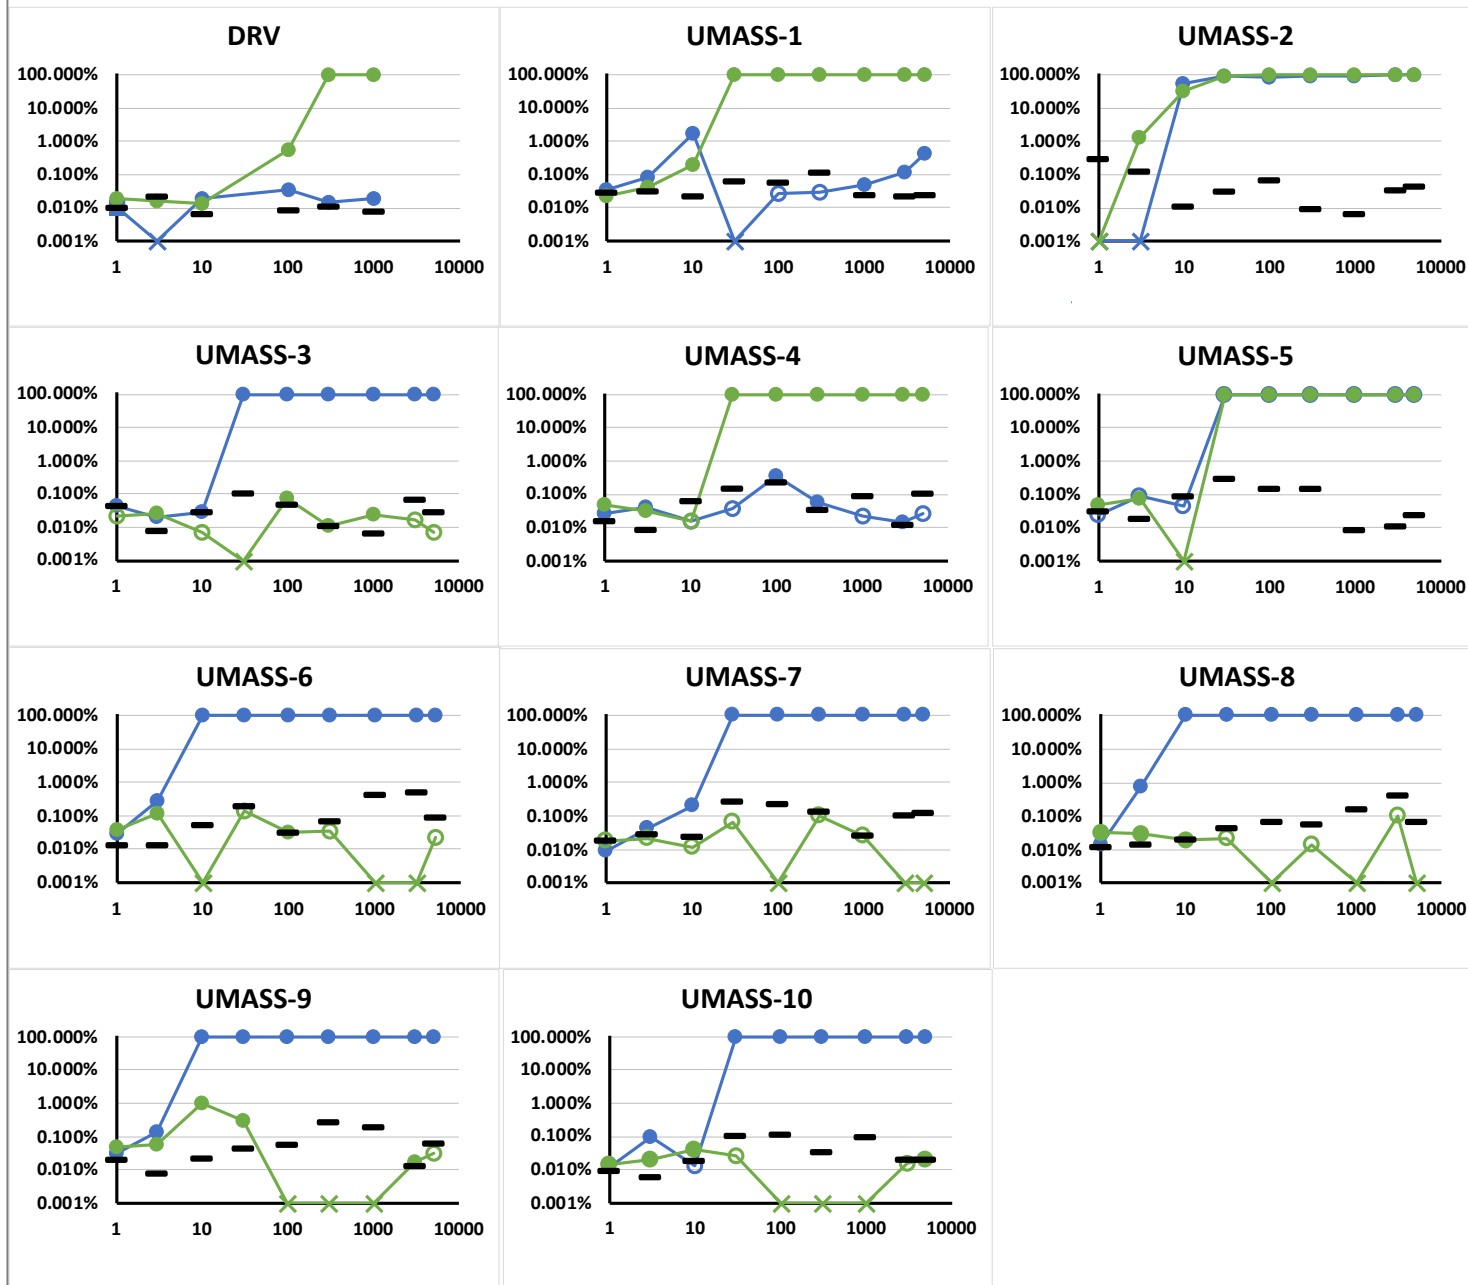

# Selection with 26 mutants

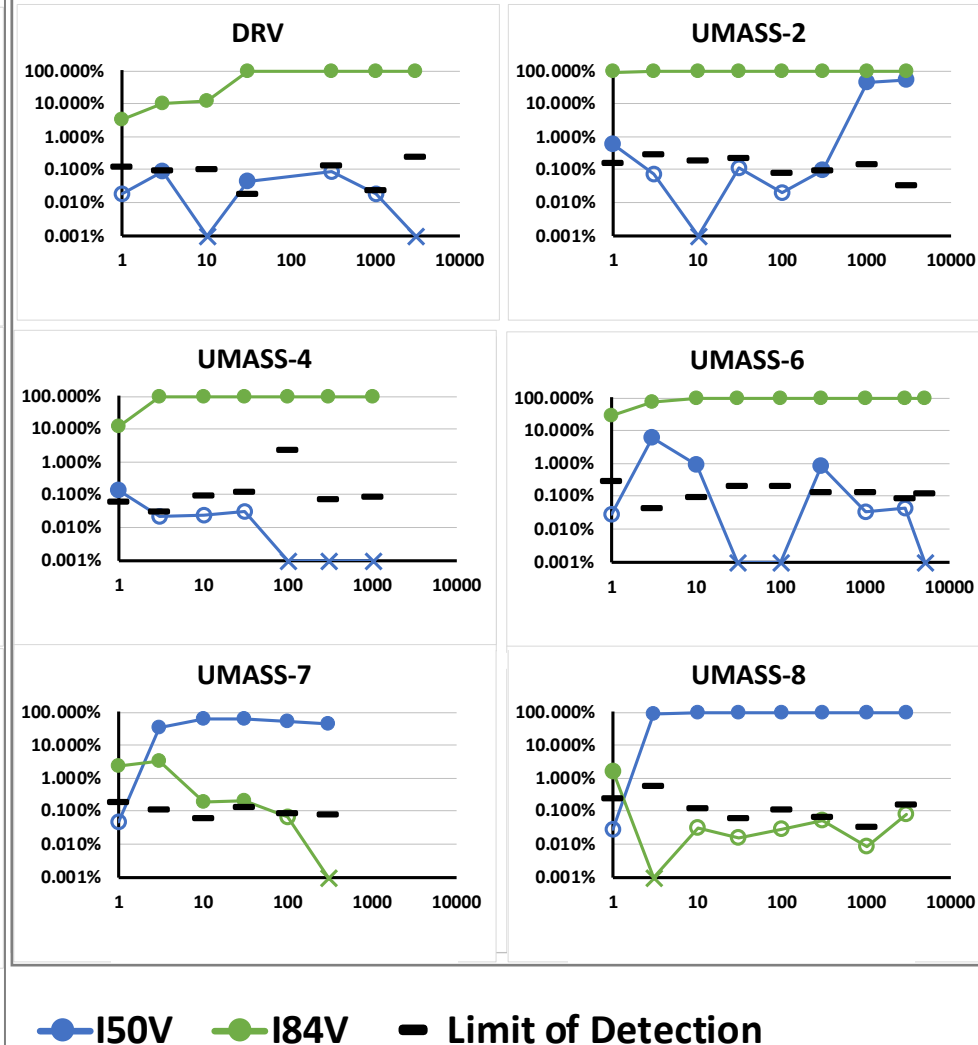

● I50V ● I84V — Limit of Detection

Supplement: supp [file elife-80328-supp-v1.zip]

**A**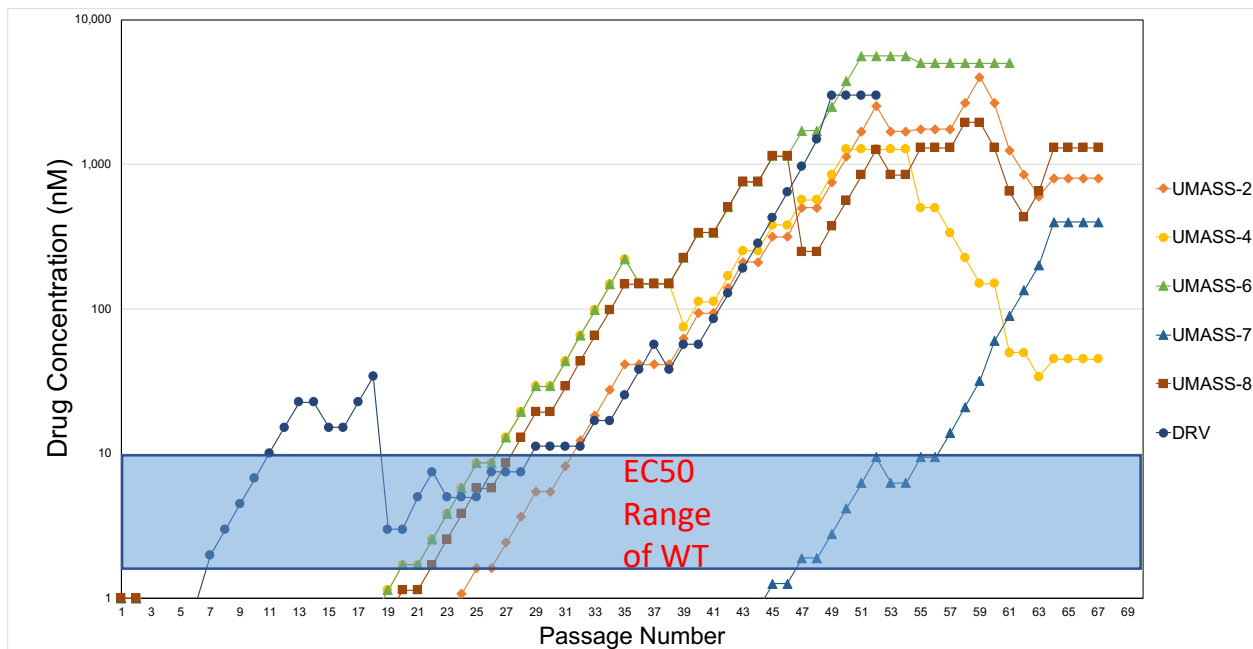

Selection with 26 Mutants

**B**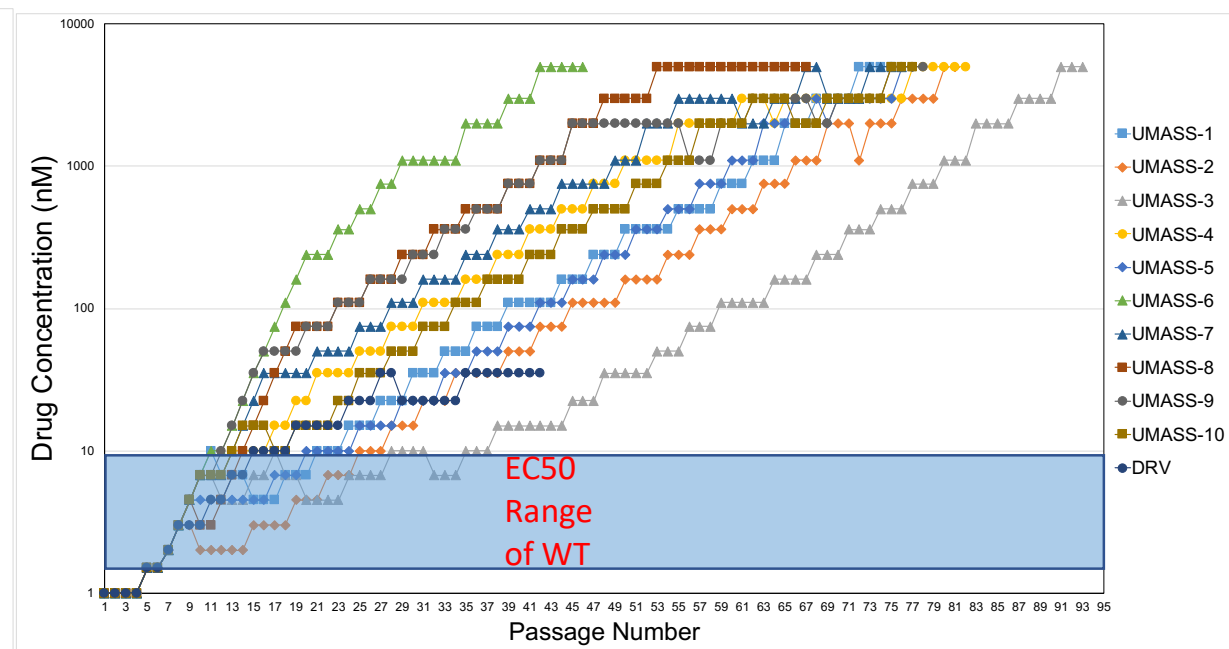

Selection with Wild-type

Supplement: supp [file elife-80328-supp-v1.zip]

**A****2nd, 3rd, and 4th Generation PIs**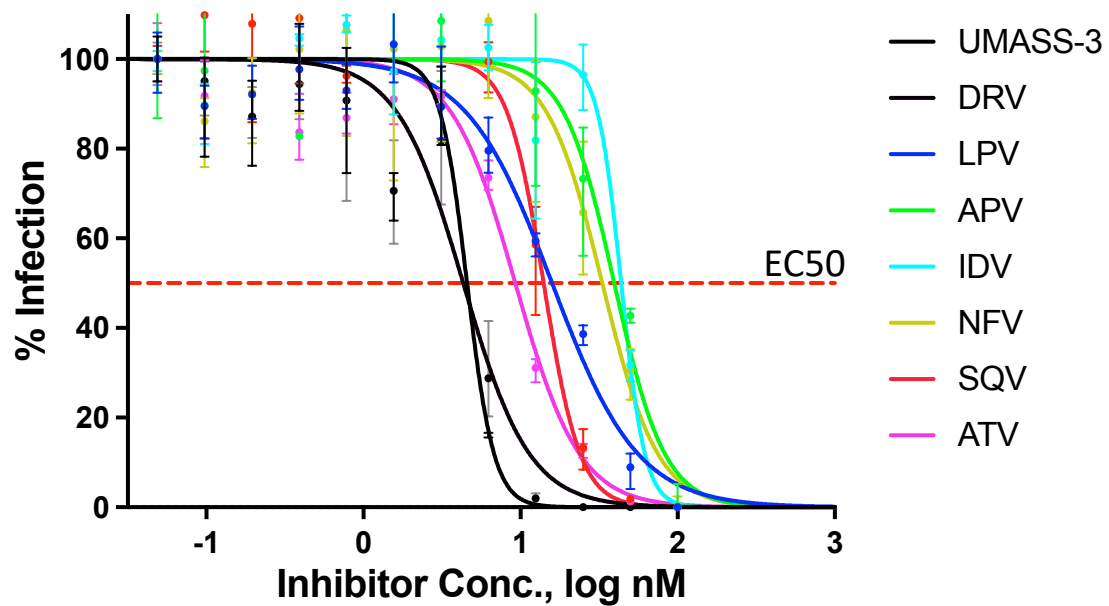**B****UMASS PIs**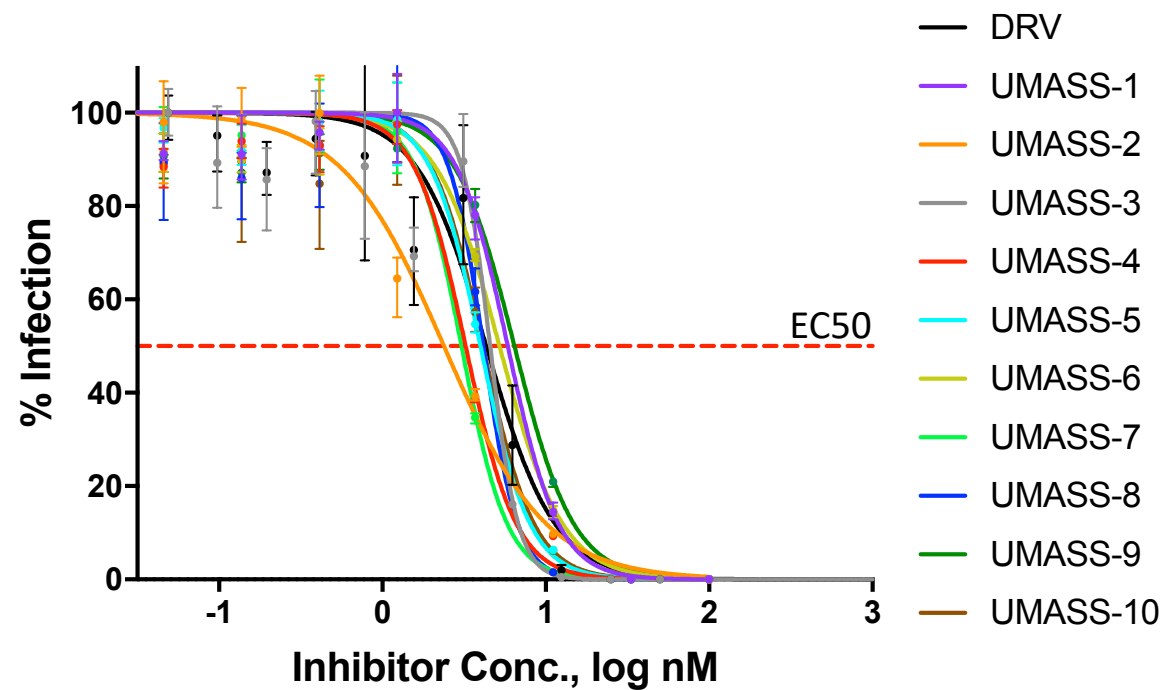

Supplement: supp [file elife-80328-supp-v1.zip]

## UMASS-1

L10I + G16E + V32I + L33F + M46I +  
I54L + A71V + L76V + V82I + I84V

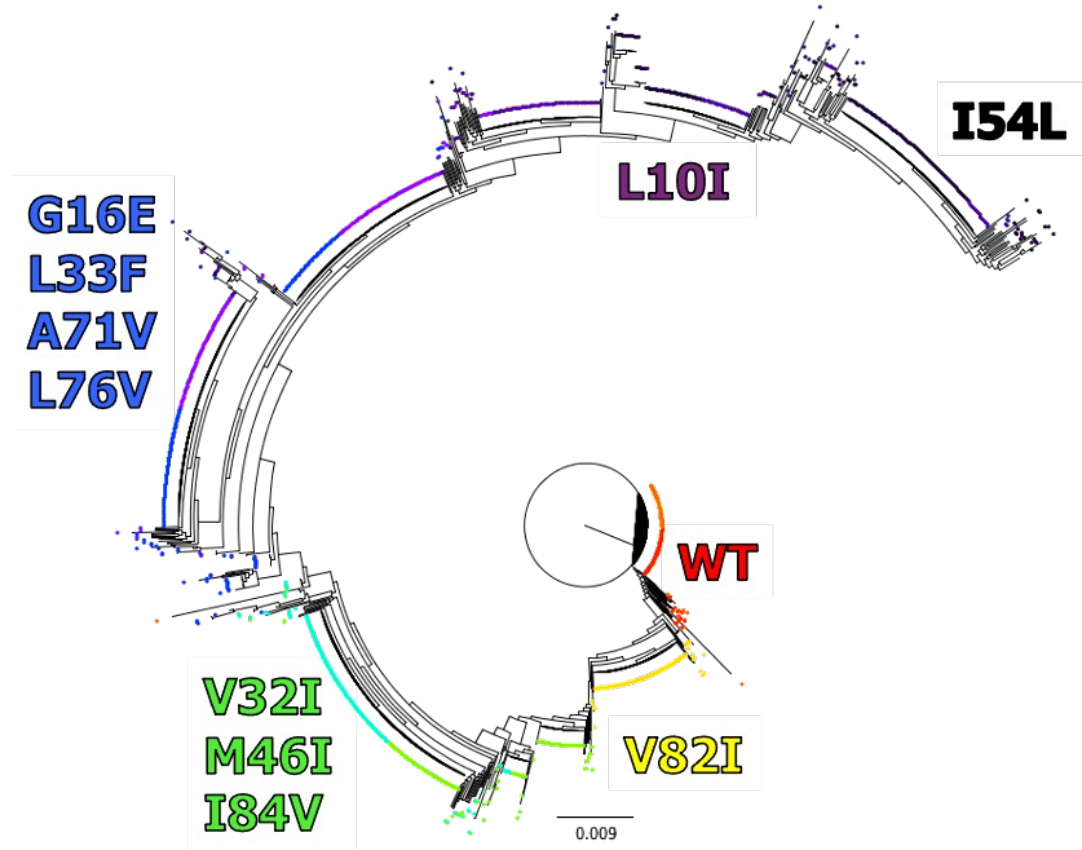

## UMASS-8

L10F + T12K + L33F + M46I + I47V + I50V +  
F53L + I54L + L63P + A71V + V82I + I85V

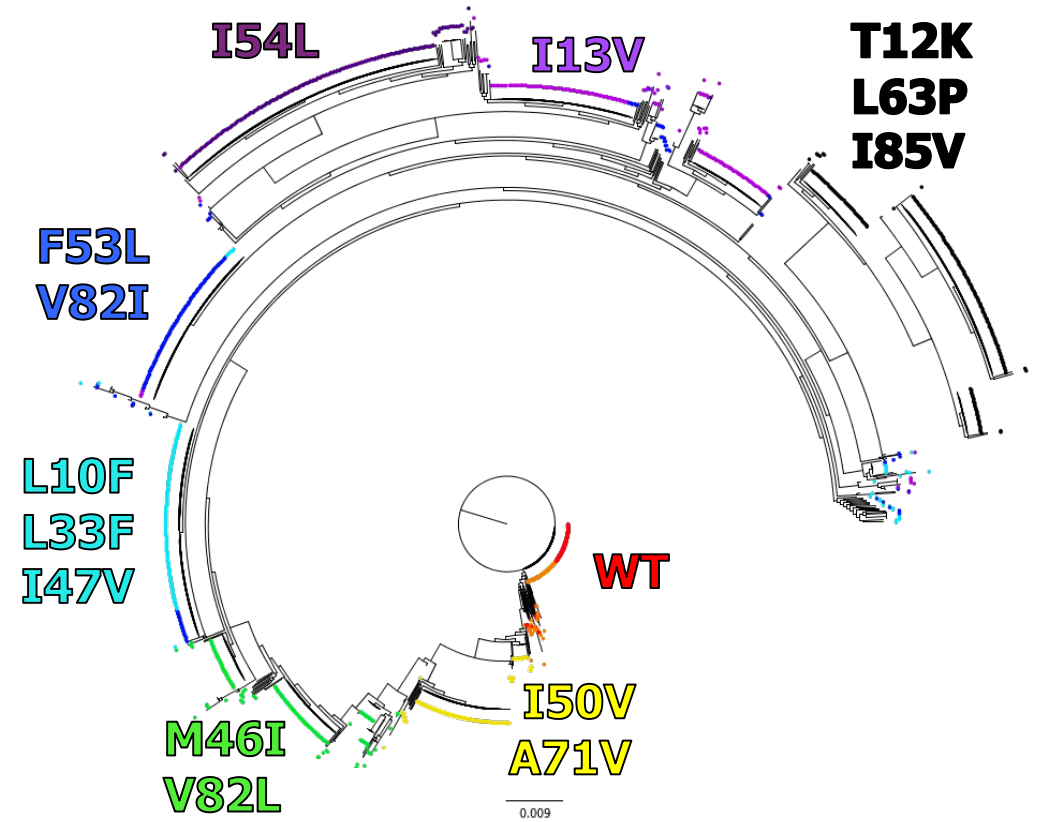

Drug Concentration (nM)

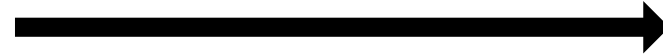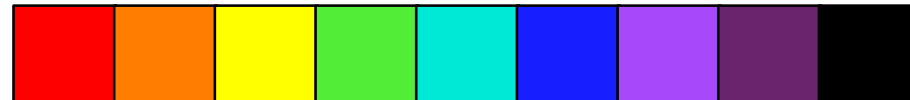

Supplement: supp [file elife-80328-supp-v1.zip]

# I84V vs I50/A71V Ki

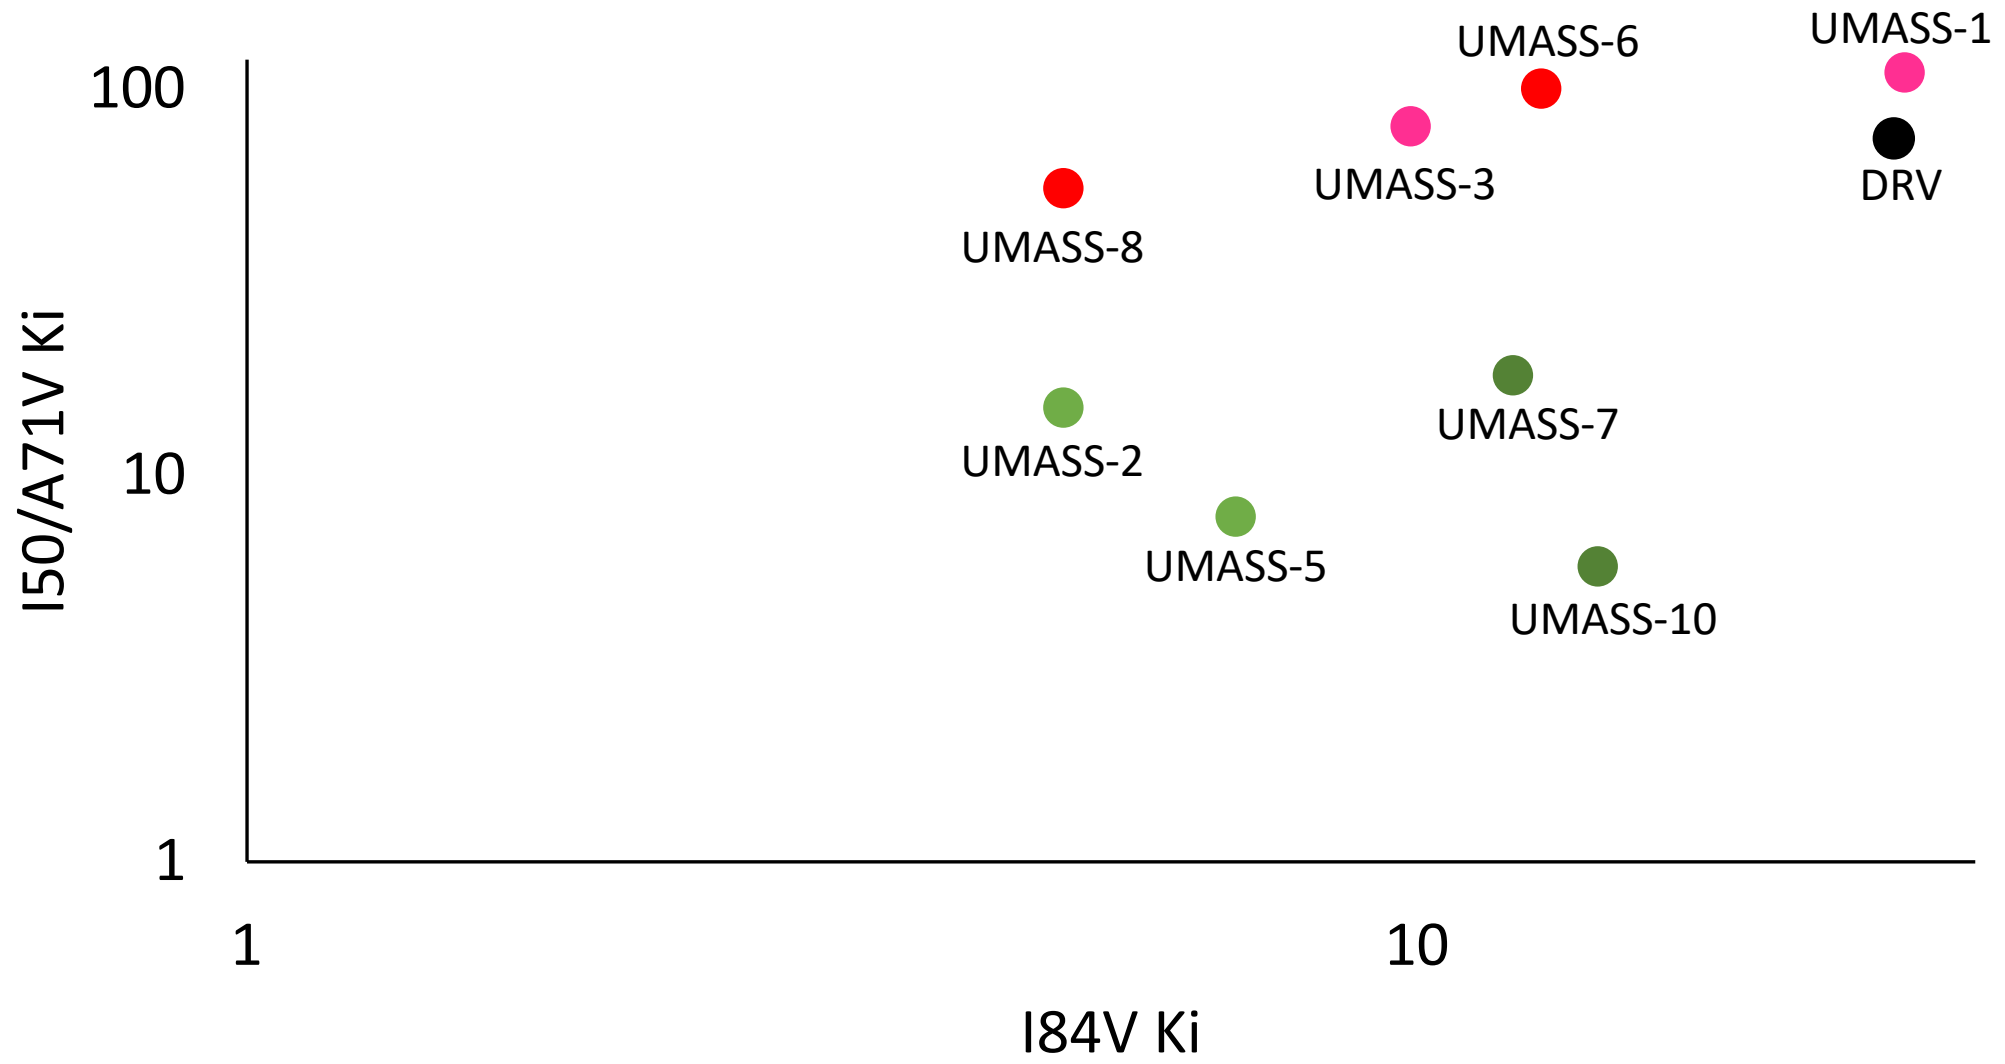

Supplement: supp [file elife-80328-supp-v1.zip]
